# Supplementary material for: Quantification of bone marrow interstitial pH and calcium concentration by intravital ratiometric imaging
Source: Research Square preprint supplement (doi:10.21203/rs.3.rs-237943/v1), 2021-02-19
Supplement: Supplementary file 1 [file 6ef7ffd5d3d8d8f396ab209a.docx]

**SUPPLEMENTARY INFORMATION**

**Figures**


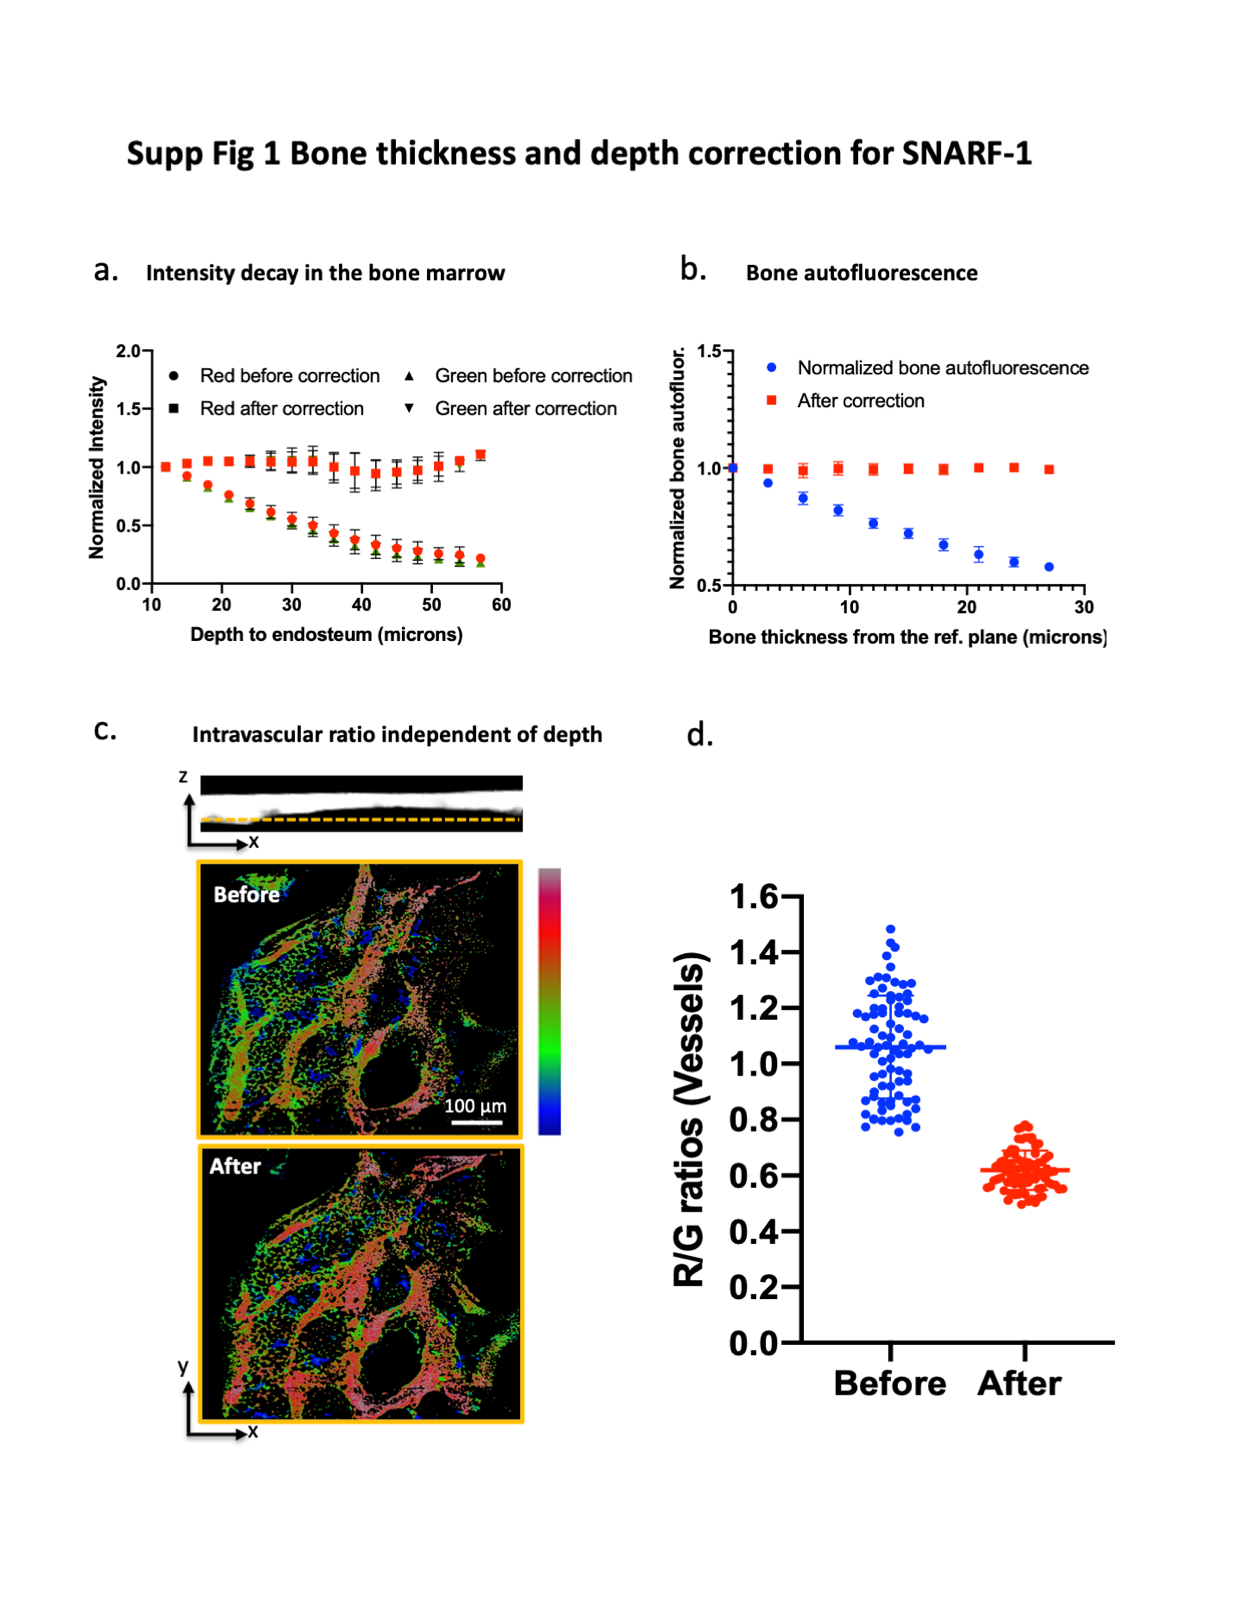


**Supplementary Figure 1.** **Bone thickness and depth correction for SNARF-1.** **(A)** Fluorescence attenuation of Rhod-5N and AF488 in the bone marrow vasculature. For each bone marrow cavity, fluorescence at each depth was retrieved by averaging the intensity values from the segmented vascular regions located at a given distance to endosteum. (n= 6 bone marrow cavities. Mean ± s.d). **(B)** Using the bone autofluorescence signal to derive the attenuation coefficient for the green channel. (n= 6 bone marrow cavities. Mean ± s.d). **(C-D)** Ratio images from a single z-plane (orange dashed line) of the bone marrow cavity. Ratiometric analyses without the two-step depth correction yielded divergent intravascular ratio, with increased R/G ratios observed at locations further from endosteum. Depth corrections minimized variation of intravascular ratios and recovered consistent pH in circulation.


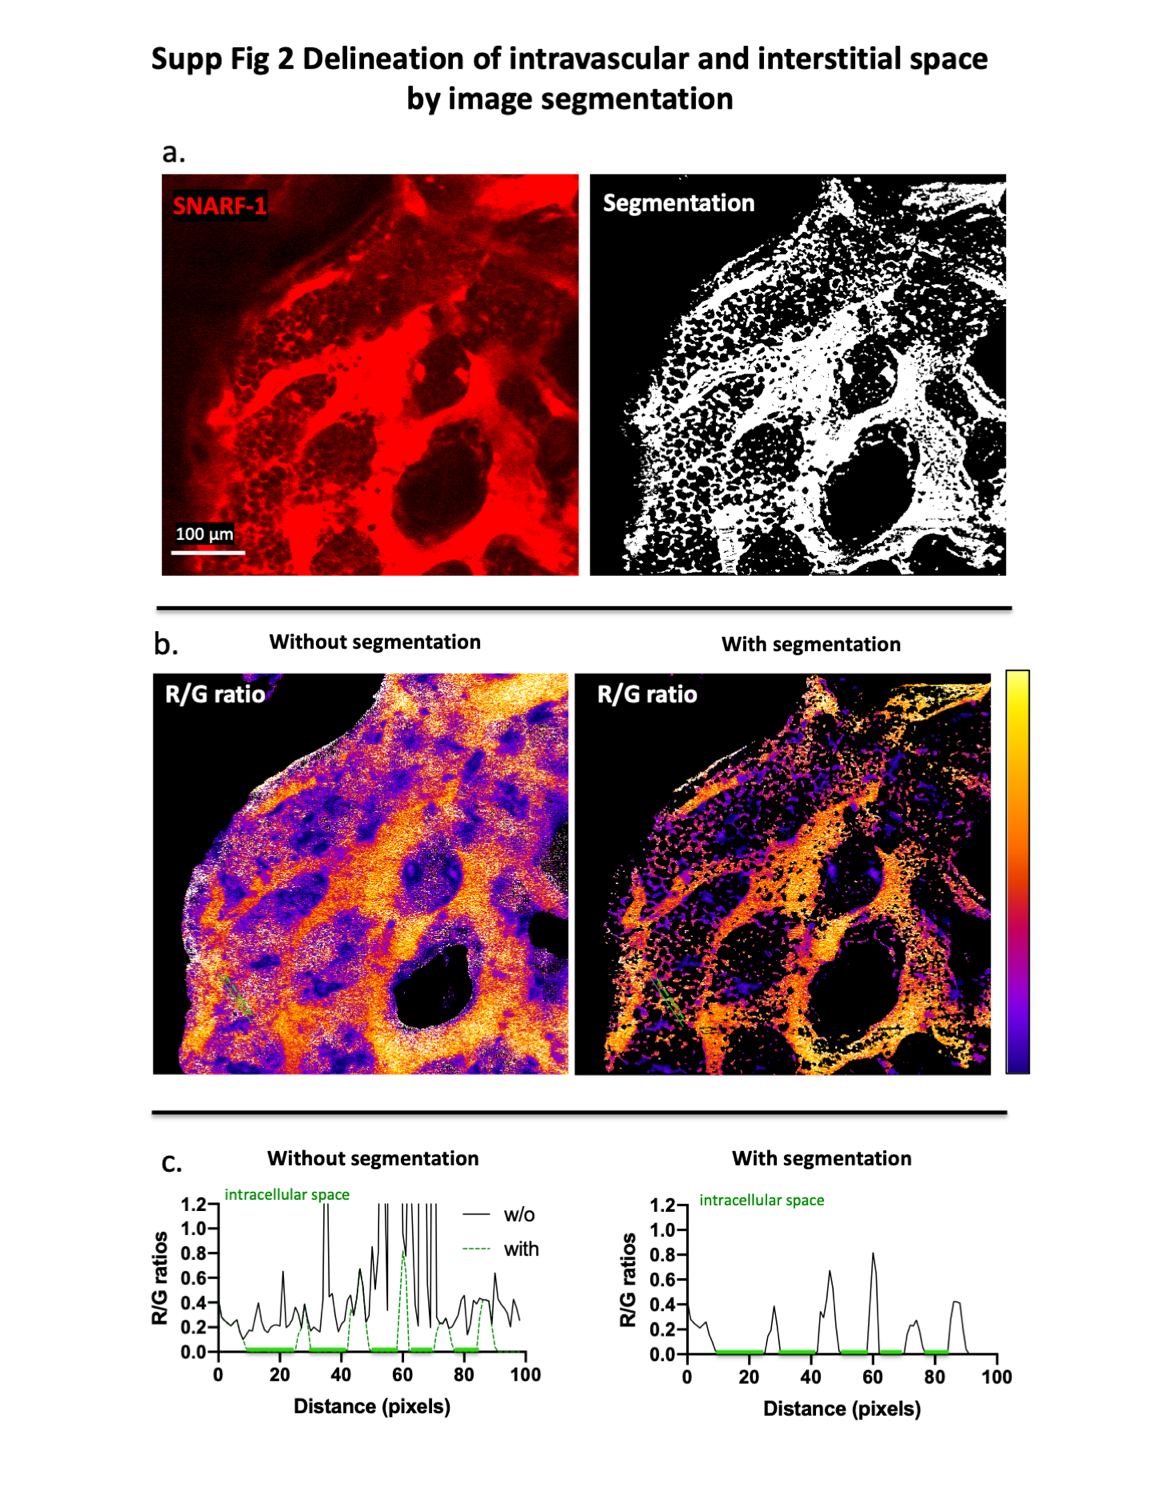


**Supplementary Figure 2.** **Delineation of intravascular and interstitial space by image segmentation. (A)** A representative image of bone marrow labeled with SNARF-1 dextran. Image segmentation was based on the red channel and is a critical step to further delineate the vasculature and interstitium while excluding background noise and intracellular regions not labeled by the cell-impermeable dye. **(B)** Ratiometric analyses based on images without or with segmentation. White (infinity) pixels in the non-segmented images were due to zeros in the green channel (denominator in the ratio) after background subtraction. **(C)** Ratios changed across the green dashed line in **(B)** showing well-defined interstitial signals from the segmented image, whereas the signal is obscured by the noise (including infinity pixels) in the non-segmented image.


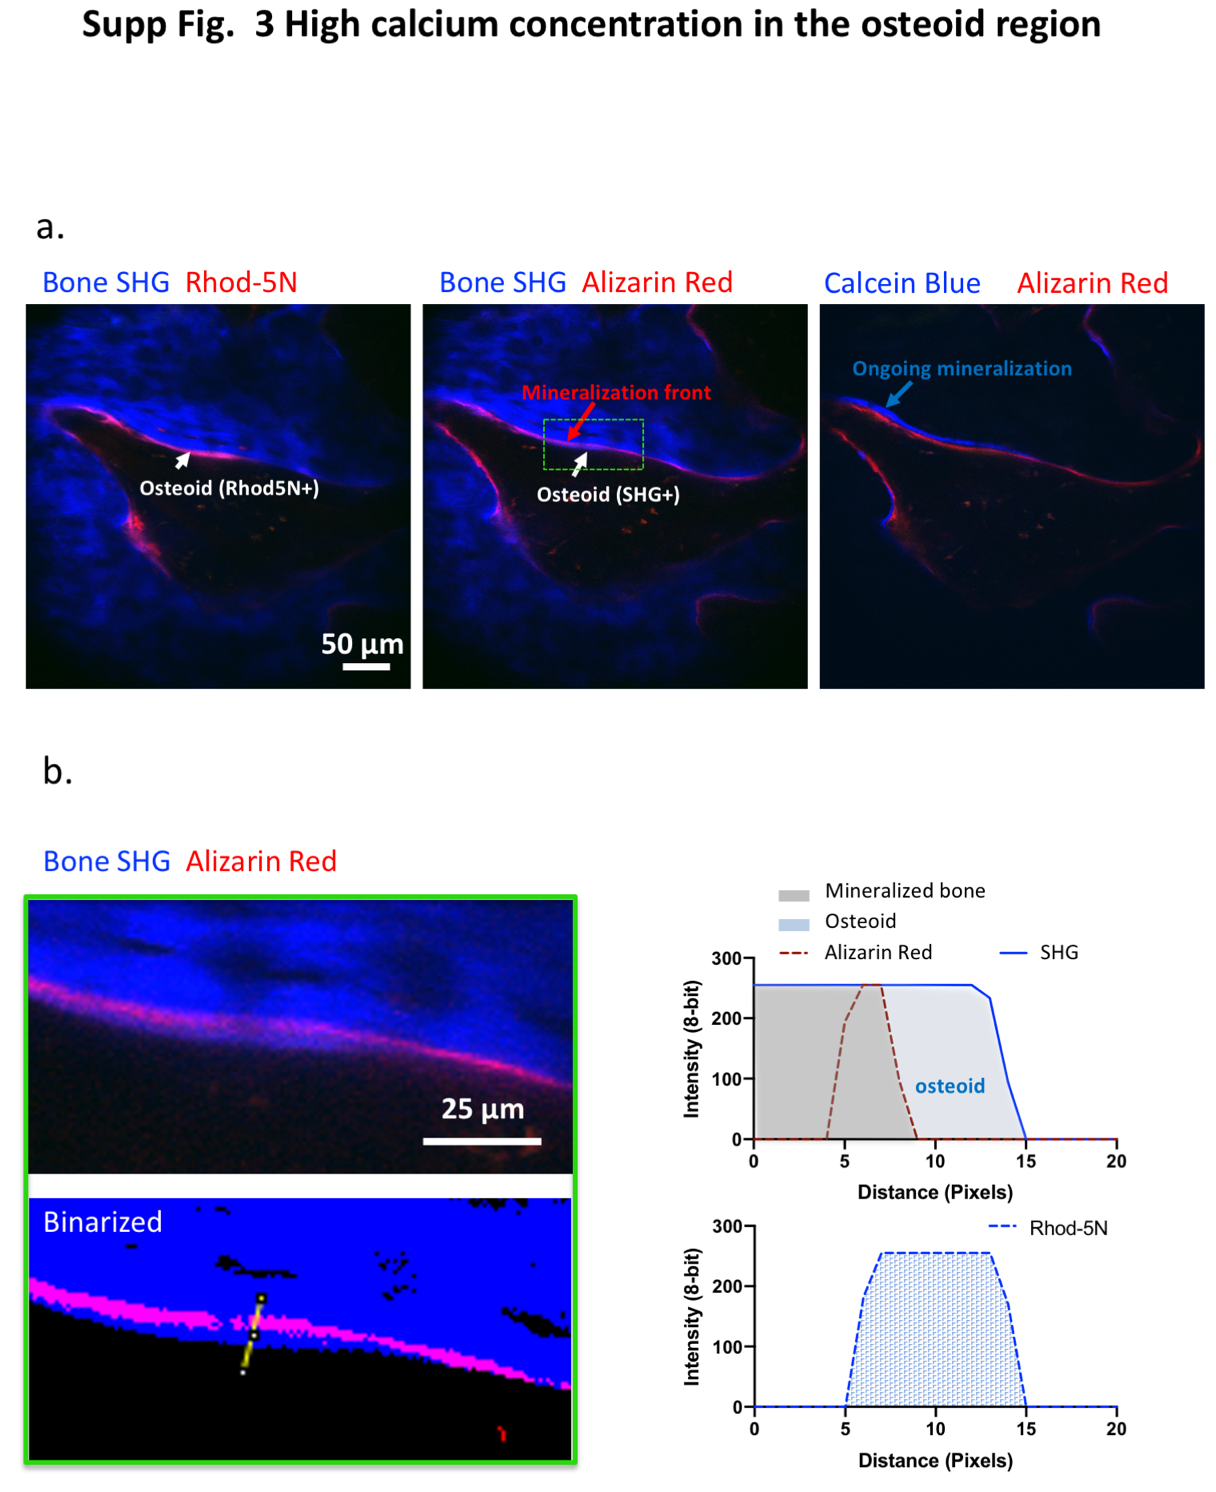


**Supplementary Figure 3.** **Osteoids are strongly labeled by Rhod-5N.** **(A)** Representative images showed a region with collagen structures (SHG) labeled by Rhod-5N, but not by Alizarin Red, indicating that the non-mineralized bone matrix with strong Rhod-5N signal correspond to osteoid, as Alizarin Red only binds to newly mineralized bone fronts. Sequential administration of bone front staining (Calcein Blue and Alizarin Red) further revealed that osteoids overlay regions with ongoing bone deposition activities. **(B)** A zoomed region (green dashed box in (A)), and the corresponding line intensity profiles based on the binarized image (yellow solid line). Line intensity profiles confirmed the non-mineralized collagen matrix (osteoid) that yields SHG signals, lacks Alizarin Red, and labeled by Rhod-5N.


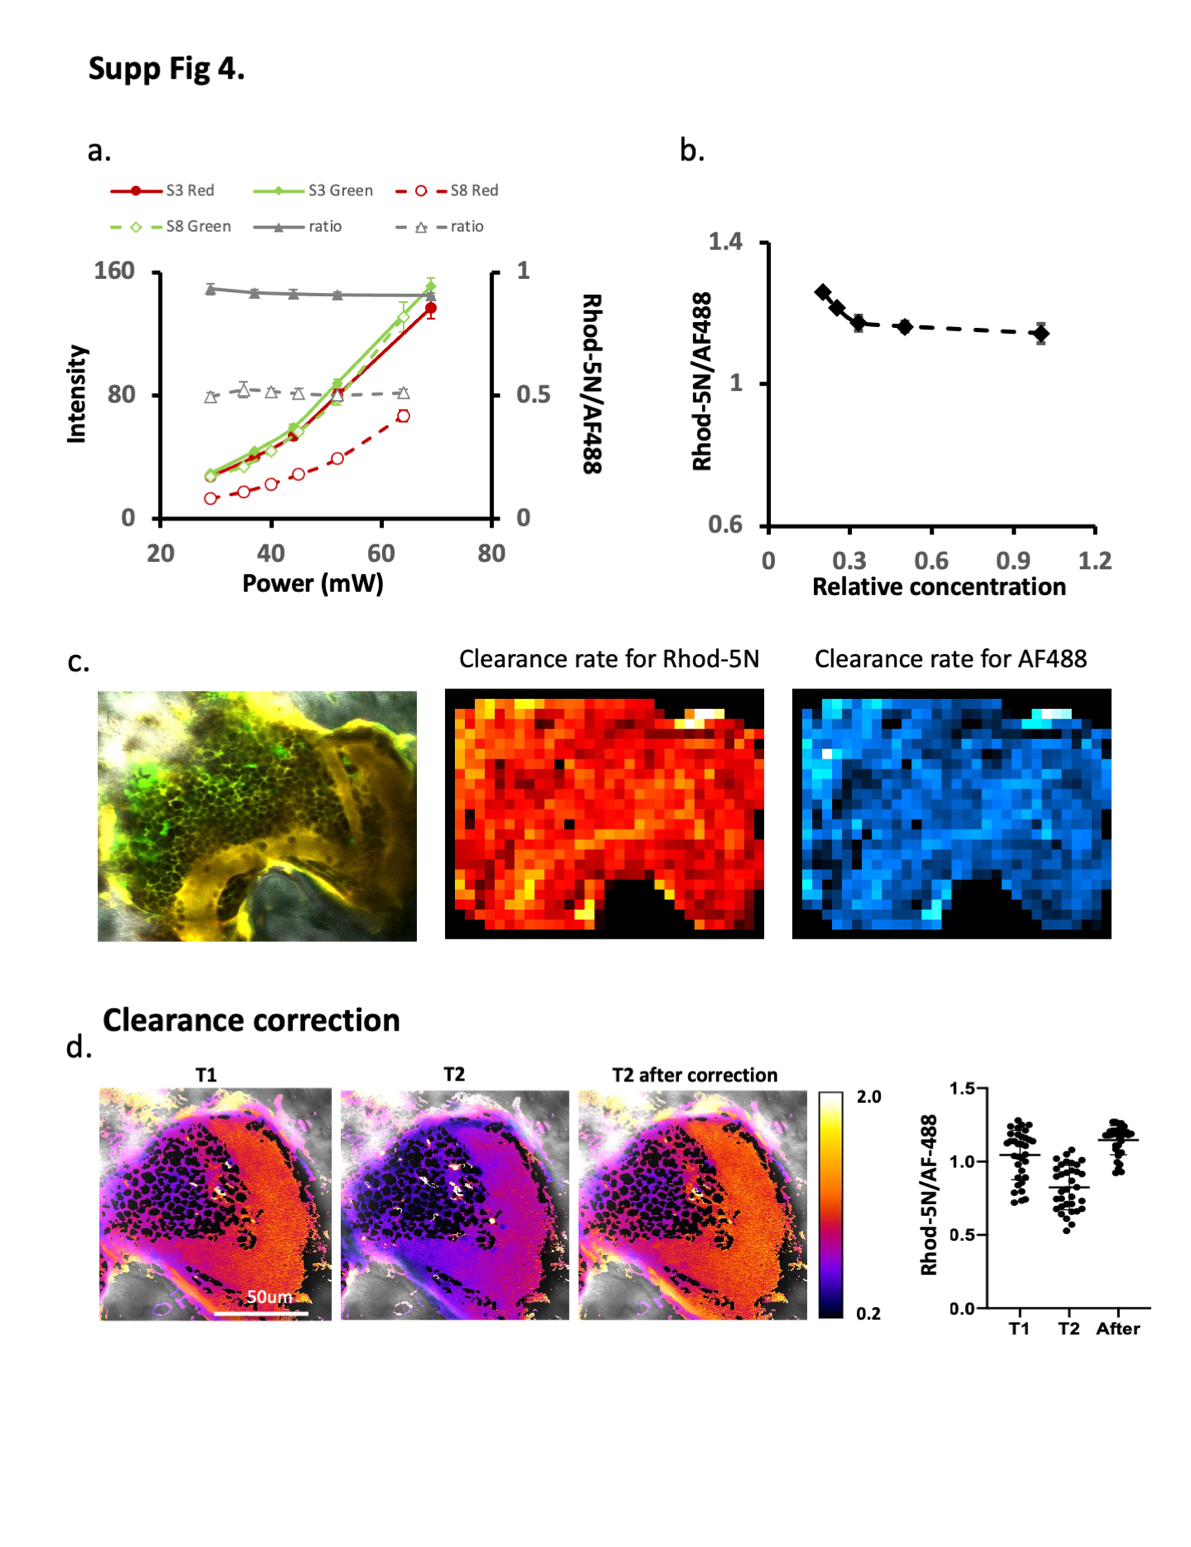


**Supplementary Figure 4.** **In vitro calibration and clearance correction of ratiometric calcium measurements.** **(A)** Power dependence of Rhod-5N and AF488 fluorescence dye pair. The fluorescence intensities of Rhod-5N from a high calcium sample (red solid line) and low calcium sample (red dashed line); the fluorescence intensities of AF488 from a high calcium sample (green solid line) and low calcium sample (green dashed line); and corresponding Rhod-5N/AF488 ratios from the high calcium sample (black solid line) and the low calcium sample (black dashed line). **(B)** The Rhod-5N/AF488 ratios at different dye concentrations. The concentration of Rhod-5N and AF488 dye pairs at in vivo experiment condition is defined as 1. **(C)** Representative ratiometric image of Rhod-5N/AF488 and the clearance coefficient map of Rhod-5N and AF488, respectively. **(D)** Ratiometric image of interstitium and vessels right after dye injection (T1), 7 minutes after injection and no clearance correction (T2) and 7 minutes after injection with clearance correction (T2 after correction). The corresponding intravascular Rhod-5N/AF488 ratios at T1, T2 without clearance correction and T2 with clearance correction. Each data point represents a subregion from the intravascular space. Mean ± s.d.


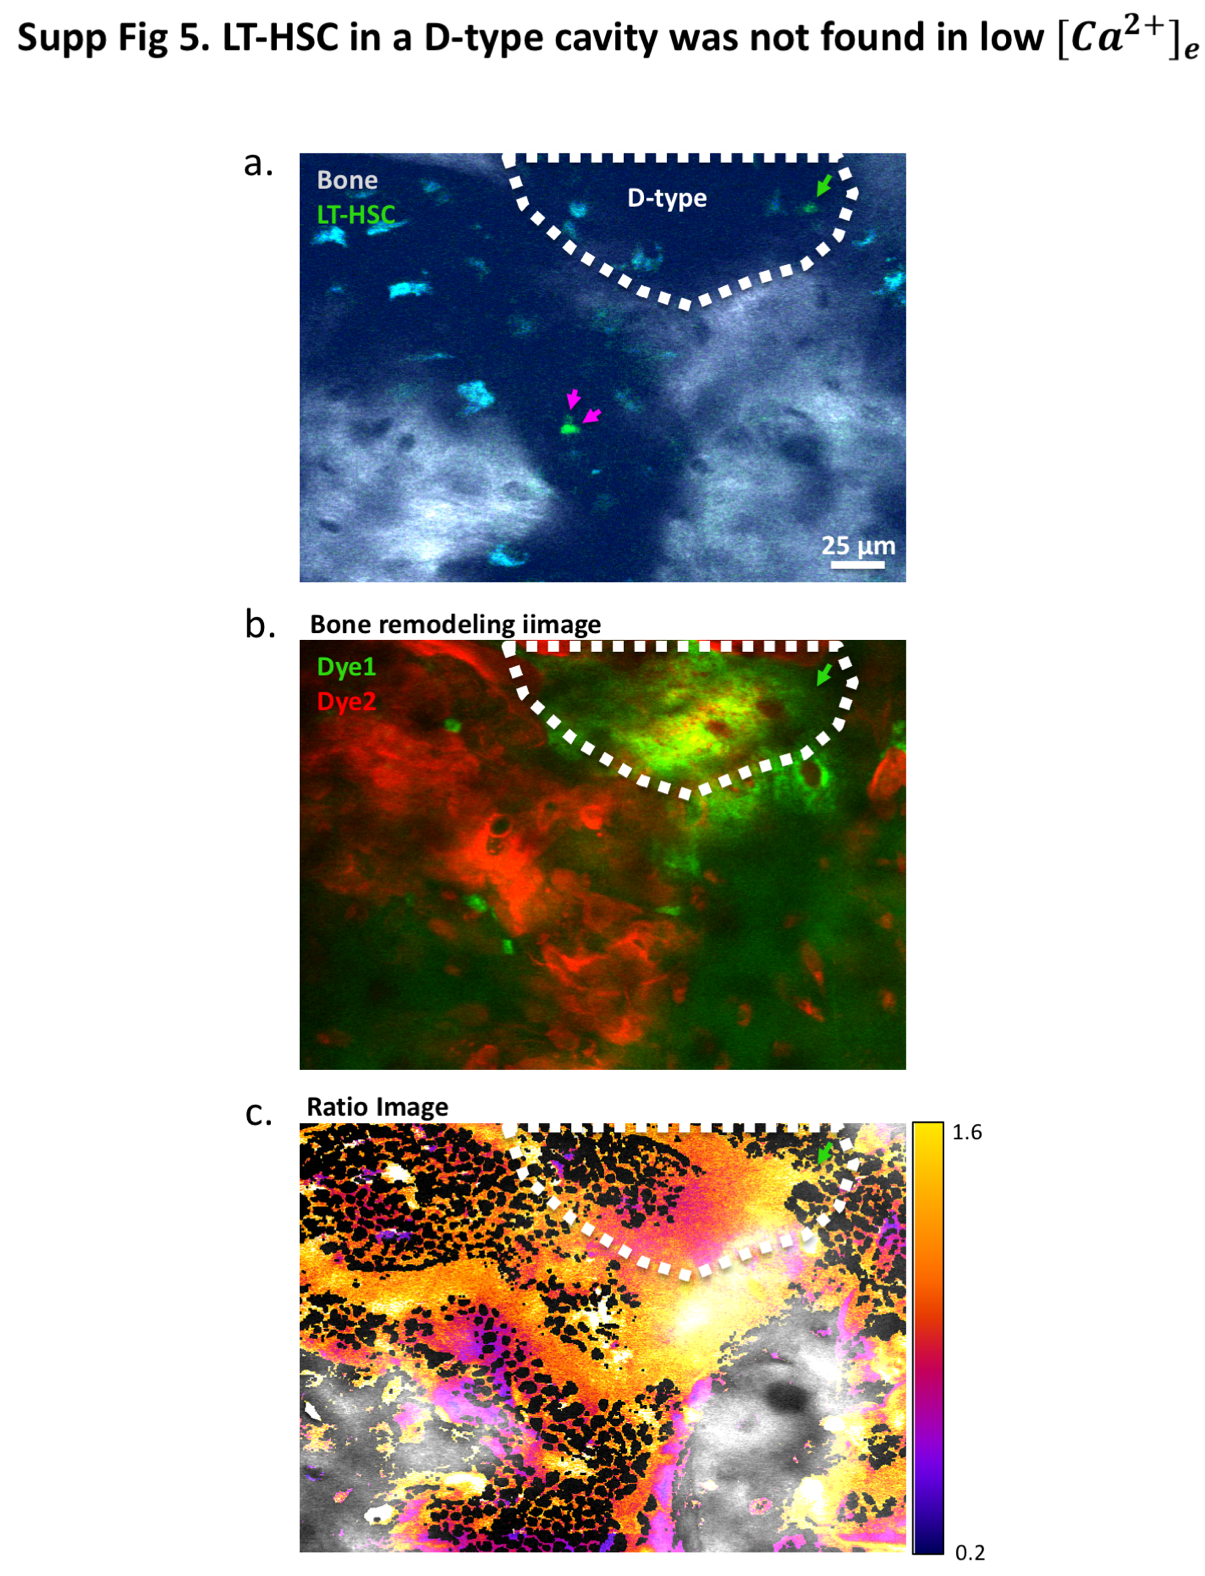


**Supplementary Figure 5.** **LT-HSC in a D-type cavity was not found in low calcium regions.** **(A-B)** A representative field of view and the corresponding bone remodeling staining showed *MDS1GFP/+;FLT3cre* LT-HSCs in a D-type (green arrow) and a R-type cavities (purple arrows). **(C)** Ratiometric imaging of Rhod-5N/AF488 revealed that the LT-HSC in the D-type cavity reside in a region with relatively high extracellular calcium (green arrow).


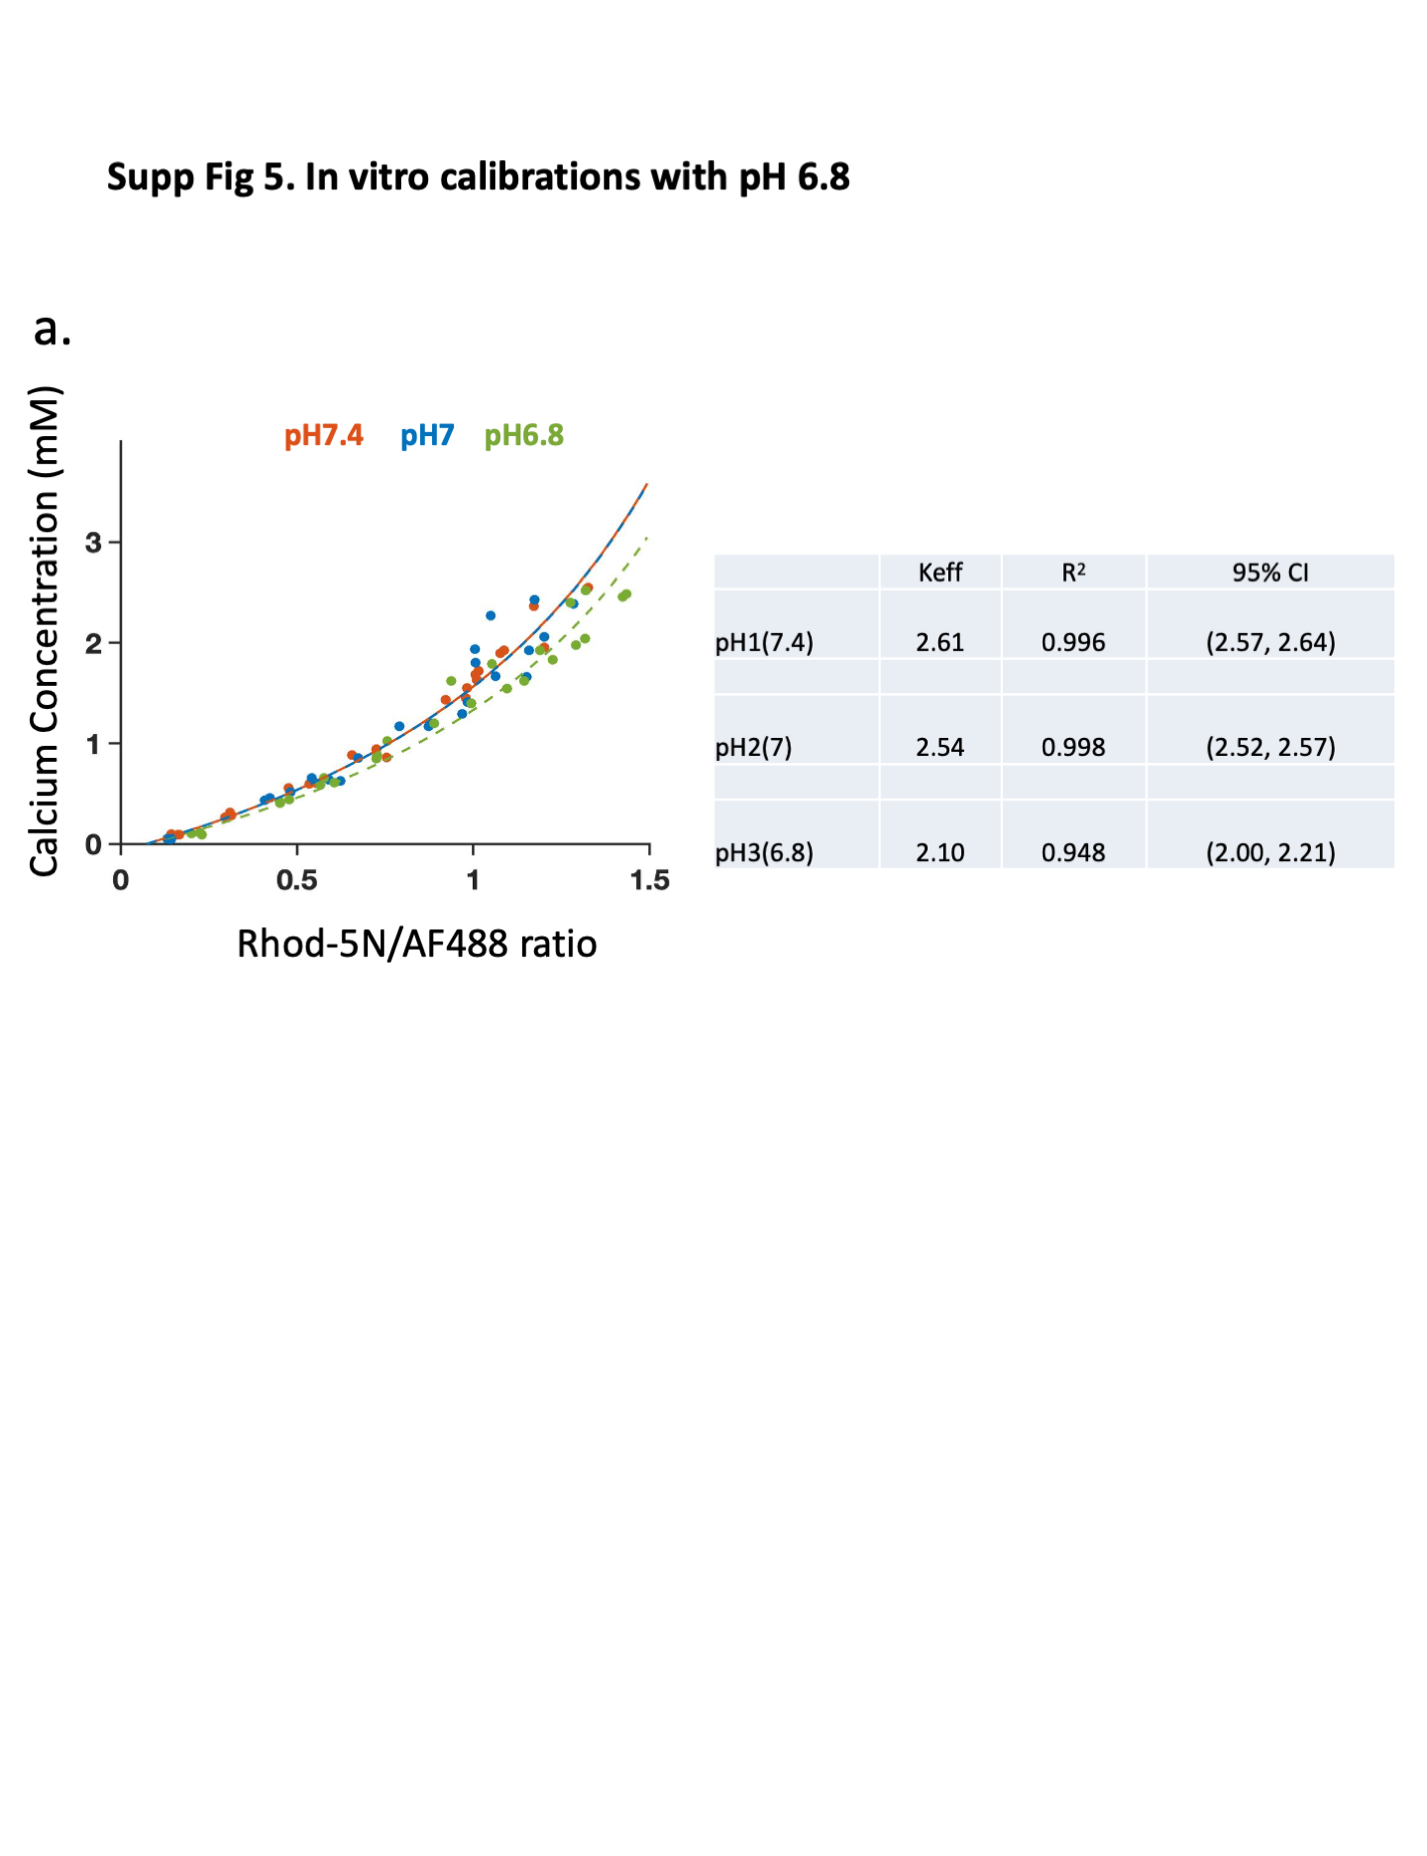


**Supplementary Figure 6.** **In vitro calibrations curves at pH 6.8 (green), pH 7.0 (blue) and pH 7.4 (red).** The Keff = 2.61 (R2 = 96.6%) at pH 7.4, Keff = 2.54 (R2 = 99.8%) at pH 7.0 and Keff = 2.10 (R2 = 94.8%) at pH = 6.8 (N=3 independent experiments, 6 measurements were performed on each in vitro sample).


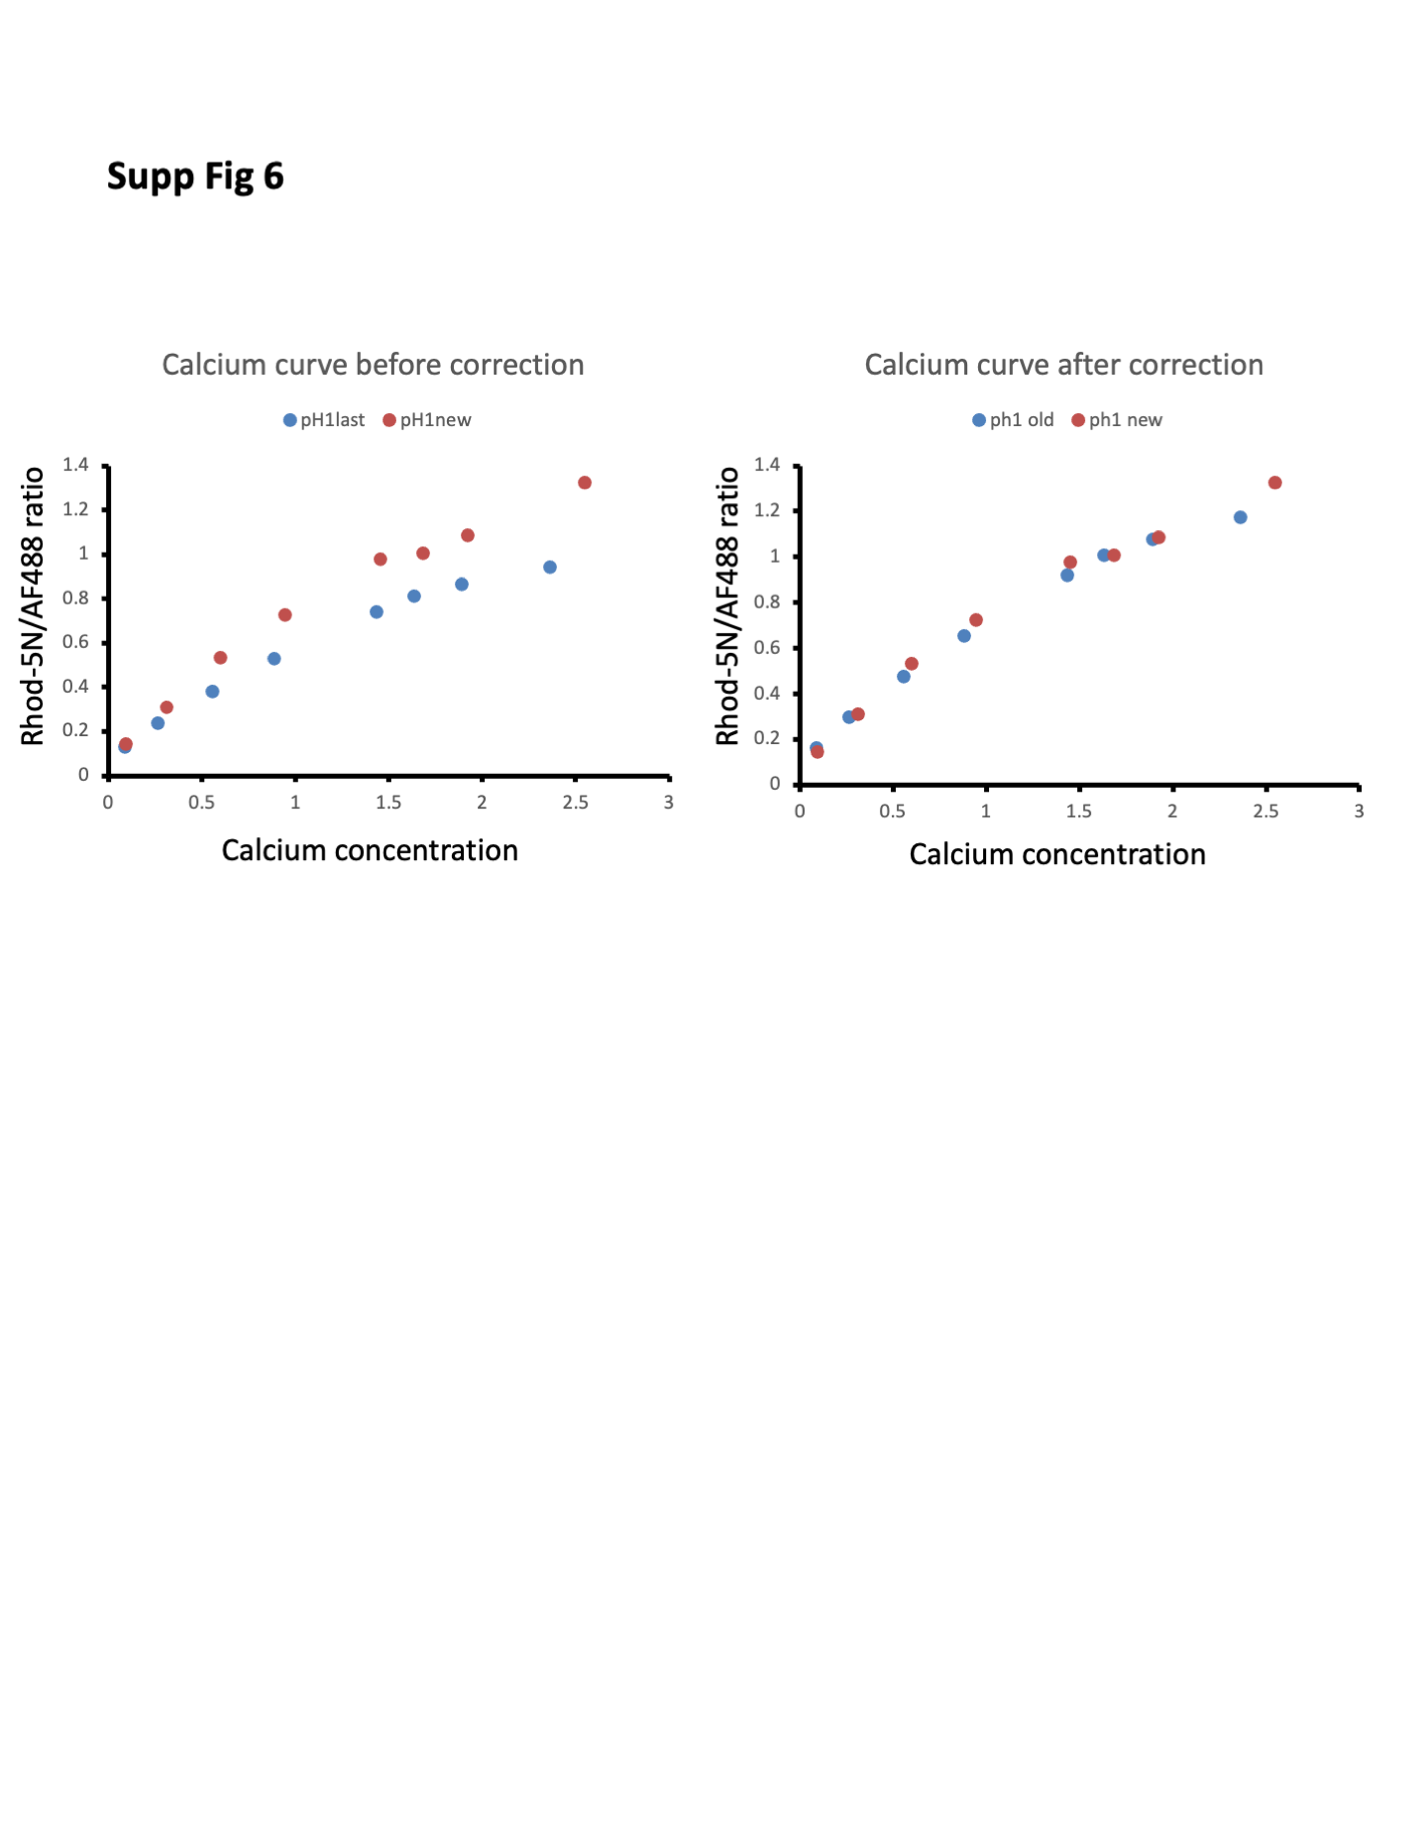


**Supplementary Figure 7**. **Calibration for ratio changes due to dye preparation. (A)** the raw calcium calibration curves generated by experiments on day1 (blue dots) and on day 2 (red dots). The Rhod-5N and AF488 were prepared and mixed independently. **(B)** the calcium calibration curves generated by experiments on day1 (blue dots) and on day 2 (red dots) with correction by equation 3.
